# Supplementary material for: Study Protocol for the Residents’ Mental Health Investigation, a Dynamic Longitudinal Study in Italy (ReMInDIt)
Source: MDPI journal article supplement (doi:10.3390/healthcare12101020), 2024-05-15
Supplement: s1 [file s1]

## Supplementary material

**Table S1.** Structure and questions included in the questionnaires.

| Sections |                                  | Questions |                                                                                                                           | Items                                                                                                                   | Round |     |
|----------|----------------------------------|-----------|---------------------------------------------------------------------------------------------------------------------------|-------------------------------------------------------------------------------------------------------------------------|-------|-----|
| Cod.     | Description                      | Cod.      | Description                                                                                                               |                                                                                                                         | 0     | 1   |
| A        | Sociodemographic characteristics | A01       | Sesso                                                                                                                     | (M; F)                                                                                                                  | 1     | x   |
| A        | Sociodemographic characteristics | A02       | Età                                                                                                                       | (Anni)                                                                                                                  | 1     | x   |
| A        | Sociodemographic characteristics | A03       | Peso                                                                                                                      | (kg)                                                                                                                    | 1     | x x |
| A        | Sociodemographic characteristics | A04       | Altezza                                                                                                                   | (m)                                                                                                                     | 1     | x   |
| A        | Sociodemographic characteristics | A05       | Stato civile                                                                                                              | (Coniugato/a; libero/a)                                                                                                 | 1     | x   |
| A        | Sociodemographic characteristics | A06       | Sei in una relazione sentimentale stabile?                                                                                | (Sì, no)                                                                                                                | 1     | x   |
| A        | Sociodemographic characteristics | A07       | Hai figli?                                                                                                                | (Più di 2, uno, zero)                                                                                                   | 1     | x   |
| A        | Sociodemographic characteristics | A08       | Abiti con altre persone?                                                                                                  | (Sì, no)                                                                                                                | 1     | x   |
| A        | Sociodemographic characteristics | A09       | Regione di residenza                                                                                                      | (Elenco regioni italiane + estero)                                                                                      | 1     | x   |
| A        | Sociodemographic characteristics | A10       | Regione di tirocinio/lavoro                                                                                               | (Elenco regioni italiane + estero)                                                                                      | 1     | x   |
| A        | Sociodemographic characteristics | A11       | Rispetto alla tua residenza, sei fuori sede?                                                                              | (Sì, no)                                                                                                                | 1     | x   |
| A        | Sociodemographic characteristics | A12       | Rispetto al luogo in cui abiti, sei pendolare?                                                                            | (Sì, no)                                                                                                                | 1     | x   |
| A        | Sociodemographic characteristics | A13       | Durante i tre mesi scorsi: sei stato gravemente malato?                                                                   | (Sì; no)                                                                                                                | 1     | x   |
| A        | Sociodemographic characteristics | A14       | Durante i tre mesi scorsi: hai avuto lutti o qualcuno tra i tuoi familiari e amici più stretti è stato gravemente malato? | (Sì, no)                                                                                                                | 1     | x   |
| A        | Sociodemographic characteristics | A15       | Durante i tre mesi scorsi: hai interrotto una relazione stabile?                                                          | (Sì, no)                                                                                                                | 1     | x   |
| A        | Sociodemographic characteristics | A16       | Durante i tre mesi scorsi: sei stato vittima di abusi o di violenza?                                                      | (Sì, no)                                                                                                                | 1     | x   |
| A        | Sociodemographic characteristics | A17       | Durante i tre mesi scorsi hai svolto lavori compatibili con la scuola di specializzazione?                                | (Sì, con ore da contratto svolte dentro l'orario formativo; Sì, con ore da contratto svolte extra orario formativo; no) | 1     | x   |
| A        | Sociodemographic characteristics | A18       | Come riesci economicamente ad arrivare a fine mese?                                                                       | (Facilmente, Con aiuto di altri, Con difficoltà)                                                                        | 1     | x   |
| B        | Residency program                | B01       | Anno di specializzazione                                                                                                  | (1°; 2°; 3°; 4°)                                                                                                        | 1     | x   |
| B        | Residency program                | B02       | Quale scuola di specializzazione frequenti?                                                                               | (Igiene e medicina preventiva; Medicina del Lavoro; Medicina Legale; altro: specificare)                                | 1     | x   |
| B        | Residency program                | B03       | Durante i tre mesi scorsi hai svolto tirocini paralleli in servizi/unità operative differenti? (Es. 2                     | (Sì; no)                                                                                                                | 1     | x   |

|                    |                       |        |                                                                                                                                                            |                                                                       |           |           |   |  |
|--------------------|-----------------------|--------|------------------------------------------------------------------------------------------------------------------------------------------------------------|-----------------------------------------------------------------------|-----------|-----------|---|--|
|                    |                       |        | giorni/sett. in un servizio e 3<br>giorni/sett. in un altro servizio)                                                                                      |                                                                       |           |           |   |  |
| B                  | Residency program     | B04    | La tua Scuola ti ha offerto un'attività didattica formale in linea con il piano formativo?                                                                 | (Assolutamente sì, più sì che no, più no che sì, assolutamente no)    | 1         |           | x |  |
| B                  | Residency program     | B05    | L'organizzazione delle attività didattiche e dei tirocini è abbastanza accurata da evitarne la sovrapposizione?                                            | (Assolutamente sì, più sì che no, più no che sì, assolutamente no)    | 1         |           | x |  |
| B                  | Residency program     | B06    | Sei soddisfatto/a della possibilità di ruotare sulle sedi della rete formativa?                                                                            | (Assolutamente sì, più sì che no, più no che sì, assolutamente no)    | 1         |           | x |  |
| B                  | Residency program     | B07    | Ritieni che la preparazione fino ad oggi ricevuta nel corso della specializzazione sia adeguata allo svolgimento della tua futura attività di specialista? | (Assolutamente sì, più sì che no, più no che sì, assolutamente no)    | 1         |           | x |  |
| B                  | Residency program     | B08    | Nella tua Scuola gli specializzandi hanno le stesse possibilità di accedere a corsi, congressi, collaborazione alle attività di ricerca?                   | (assolutamente sì, più sì che no, più no che sì, assolutamente no)    | 1         |           | x |  |
| B                  | Residency program     | B09    | Ti ritieni complessivamente soddisfatto/a della Scuola di specializzazione?                                                                                | (Assolutamente sì, più sì che no, più no che sì, assolutamente no)    | 1         |           | x |  |
| B                  | Residency program     | B10-22 | Work-related Stress Questionnaire                                                                                                                          | (Mai; raramente; qualche volta; spesso; sempre)                       | 13        | x         | x |  |
| C                  | Lifestyle information | C01-13 | Chrono Med Diet Score                                                                                                                                      | /                                                                     | 13        | x         |   |  |
| C                  | Lifestyle information | C14    | In tutta la tua vita, hai fumato in tutto almeno 100 sigarette (5 pacchetti da 20 sigarette)?                                                              | (Sì, No, non so o non ricordo)                                        | 1         | x         |   |  |
| C                  | Lifestyle information | C15    | Attualmente fumi sigarette?                                                                                                                                | (Sì, no)                                                              | 1         | x         |   |  |
| D                  | Mental health         | D01    | Hai mai ricevuto una diagnosi di depressione?                                                                                                              | (Sì, no)                                                              | 1         | x         |   |  |
| D                  | Mental health         | D02    | Hai mai ricevuto una diagnosi di disturbo dello spettro ansioso?                                                                                           | (Sì, no)                                                              | 1         | x         |   |  |
| D                  | Mental health         | D03-09 | Sintomi ansiosi: GAD-7                                                                                                                                     | (Mai; alcuni giorni; per oltre la metà dei giorni; quasi ogni giorno) | 7         | x         | x |  |
| D                  | Mental health         | D10-18 | Sintomi depressivi: PHQ-9                                                                                                                                  | (Mai; alcuni giorni; per oltre la metà dei giorni; quasi ogni giorno) | 9         | x         | x |  |
| <b>Total items</b> |                       |        |                                                                                                                                                            |                                                                       | <b>60</b> | <b>43</b> |   |  |

\*The table displays the structure of the questionnaires at Round 0 and Round 1. The columns, in order, feature: the sections' code and descriptions, the questions' codes and text, possible answers, the items count, and whether the question was included in Round 0, Round 1, or both rounds. Questions extracted from validated questionnaires are not fully transcribed.
